# Supplementary material
Source: bioRxiv or medRxiv preprint supplement (https://www.biorxiv.org/highwire/filestream/108602/field_highwire_adjunct_files/21/178806-29.pdf)
Supplement: Supplementary file [file 178806-29.pdf]

| IDP Group name     | Number of IDPs | Number of associated loci with $-\log_{10} p > 11$ | Number of associated loci with $-\log_{10} p > 7.5$ | Average heritability per IDP group |
|--------------------|----------------|----------------------------------------------------|-----------------------------------------------------|------------------------------------|
| T1-SIENAX          | 10             | 0                                                  | 14                                                  | 0.413                              |
| T1-FIRST           | 22             | 5                                                  | 18                                                  | 0.337                              |
| T1-FAST_ROIs       | 139            | 24                                                 | 88                                                  | 0.288                              |
| T2-FLAIR-BIANCA    | 1              | 2                                                  | 3                                                   | 0.441                              |
| SWI-T2*            | 21             | 47                                                 | 89                                                  | 0.320                              |
| FreeSurfer         | 483            | 33                                                 | 185                                                 | 0.250                              |
| dMRI               | 675            | 225                                                | 599                                                 | 0.363                              |
| tfMRI              | 16             | 0                                                  | 0                                                   | 0.071                              |
| rfMRI-nodes (25)   | 21             | 32                                                 | 266                                                 | 0.186                              |
| rfMRI-edges (25)   | 210            | 0                                                  | 22                                                  | 0.054                              |
| rfMRI-nodes (100)  | 55             | 15                                                 | 83                                                  | 0.196                              |
| rfMRI-edges (100)  | 1485           | 1                                                  | 121                                                 | 0.054                              |
| rfMRI-ICA features | 6              | 4                                                  | 11                                                  | 0.349                              |

**Supplementary Table 4: Summary of associations by IDP group.** The table shows the number of associated genetic loci stratified by IDP group. Column 2: the number of IDPs in each group. Column 3: the number of associated genetic loci (from **Supplementary Table 6**) for each group. Column 4: the number of associated genetic loci (from **Supplementary Table 5**) for each group. Column 5: the average heritability per IDP group (from **Figure 1**). Columns 3 and 4 also include the number of associated loci per IDP for each group. The rfMRI IDP groups are split according to the size of the netmat parcellation (25 or 100 parcels).
